# Supplementary material
Source: publisher site journal article supplement (https://www.dovepress.com/article/368659)
Supplement: Supplementary file 1 [file get_supplementary_file.php]

**Table S1 Sleep analysis of different types of OSA**

|  | Total | REM-OSA  N=687 | NREM-OSA  N=1904 | non-stage specific-OSA  N=239 | *p* value |
| --- | --- | --- | --- | --- | --- |
| REM, %, median(IQR) | 14(11.8-16.9) | 14.4(12.2-17.7) | 13.8(11.5-16.5) | 13.9(12-16.5) | <0.01a |
| N1, %, median(IQR) | 16.2(11-23.6) | 12.1(8.5-16.5) | 19.3(13.7-27.1) | 14.7(10.5-21.2) | <0.01a,b,c |
| N2, %, median(IQR) | 55.1(47.6-61.9) | 58.6(52.2-64.2) | 52.7(45.1-59.4) | 56.5(50.3-64) | <0.01a,c |
| N3, %, median(IQR) | 0.6(0-4.6) | 1.6(0-6.8) | 0.3(0-3.5) | 0.9(0-5) | <0.01a |

The three groups were compared with Kruskal-Wallis test with Scheffé method for post-hoc analysis.

**Notes:** a=statistical significance in post-hoc analysis compared REM-OSA and NREM-OSA groups; b= statistical significance in post-hoc analysis compared REM-OSA and non-stage specific-OSA groups; c=statistical significance in post-hoc analysis compared NREM-OSA and non-stage specific-OSA groups.

**Abbreviations:** IQR, interquartile range; NREM, non-rapid eye movement; OSA, obstructive sleep apnea; REM, rapid eye movement.

**Table S2** **Demographics of REM-isolated OSA patients and other OSA patients**

|  | REM isolated  N=177 | Others  N=1154 | *p* value |
| --- | --- | --- | --- |
| Age, yr, median(IQR) | 52(42-60) | 53(42-61) | 0.21 |
| Gender(male), N(%) | 99(55.9) | 959(83.1) | <0.01 |
| BMI, kg/cm2, median(IQR) | 25.7(23.2-28.2) | 27.1(24.6-30.1) | <0.01 |
| Smoker, N(%) | 49(27.7) | 360(31.2) | 0.35 |
| ESS, median(IQR) | 5(3.5-8) | 6(4-9) | 0.06 |
| AHI, events/hr, median(IQR) | 7.3(6-9.2) | 26.3(14.7-45.3) | <0.01 |
| REM-AHI, events/hr, median(IQR) | 28.7(21-38.1) | 36.9(18-54.9) | <0.01 |
| NREM-AHI, events/hr, median(IQR) | 3.5(2.5-4.2) | 24.6(12-45.3) | <0.01 |
| REM latency, min, median(IQR) | 85(68.3-109.8) | 87.5(70-116.4) | 0.37 |
| REM duration, min, median(IQR) | 48.3(38.8-59.8) | 44.1(36.5-54.4) | <0.01 |
| REM percentage, %, median(IQR) | 15.1(12.7-18.2) | 13.9(11.7-16.6) | <0.01 |

The two groups were compared with Mann-Whitney U test and Chi square test.

**Abbreviations:** AHI, apnea–hypopnea index; BMI, body mass index; ESS, Epworth’s sleepiness score; IQR, interquartile range; NREM, non-rapid eye movement; OSA, obstructive sleep apnea; REM, rapid eye movement.

Table S3 Profile of the severe OSA patient with REM-OSA.

|  | REM  N=1 |
| --- | --- |
| Age, yr | 67 |
| Gender | Male |
| BMI, kg/cm2, median(IQR) | 22.8 |
| Smoker | Yes |
| ESS | 3 |
| AHI, events/hr | 36.6 |
| REM-AHI, events/hr | 41.3 |
| NREM-AHI, events/hr | 13.0 |
| REM latency, min | 68.9 |
| REM duration, min | 30.1 |
| REM percentage, % | 12.1 |
| Desaturation index, events/hr | 31.8 |
| SpO2<90%, min | 27 |
| Nadir SpO2, % | 76 |
| Hypertension | Yes |
| Diabetes | Yes |
| Heart disease | No |
| Stroke | No |
| Hyperlipidemia | Yes |
| Anxiety | No |
| Depression | No |

**Abbreviations:** AHI, apnea–hypopnea index; BMI, body mass index; ESS, Epworth’s sleepiness score; NREM, non-rapid eye movement; OSA, obstructive sleep apnea; REM, rapid eye movement
